1  
2 **Multi-step regulation of transcription kinetics explains the non-linear relation**  
3 **between RNA polymerase II density and mRNA expression in Dosage**  
4 **Compensation**

5  
6  
7 Pouria Dasmeh<sup>1,2,3</sup>

8  
9  
10 <sup>1</sup>Departement de Biochimie, <sup>2</sup>Centre Robert Cedergren en Bioinformatique et  
11 Génomique, Université de Montréal, 2900 Edouard-Montpetit, Montreal, Quebec  
12 H3T 1J4, Canada. <sup>3</sup>Department of Chemistry and Chemical Biology, Harvard  
13 University, Cambridge, MA USA 02139.

14  
15  
16  
17  
18 **Abstract**

19  
20 In heterogametic organisms, expression of unequal number of X chromosomes in males  
21 and females is balanced by a process called dosage compensation. In *Drosophila* and  
22 mammals, dosage compensation involves nearly two-fold up-regulation of the X  
23 chromosome mediated by dosage compensation complex (DCC). Experimental studies  
24 on the role of DCC on RNA polymerase II (Pol II) transcription in mammals disclosed  
25 a non-linear relationship between Pol II densities at different transcription steps and  
26 mRNA expression. An ~20-30% increase in Pol II densities corresponds to a rough  
27 200% increase in mRNA expression and two-fold up-regulation. Here, using a simple  
28 kinetic model of Pol II transcription calibrated by *in vivo* measured rate constants of  
29 different transcription steps in mammalian cells, we demonstrate how this non-linearity  
30 can be explained by multi-step transcriptional regulation. Moreover, we show how  
31 multi-step enhancement of Pol II transcription can increase mRNA production while  
32 leaving Pol II densities unaffected. Our theoretical analysis not only recapitulates  
33 experimentally observed Pol II densities upon two-fold up-regulation but also points to  
34 a limitation of inferences based on Pol II profiles from chromatin immunoprecipitation  
35 sequencing (ChIP-seq) or global run-on assays.

36 **Body**

37

38 Unequal number of X chromosomes in males and females of several organisms  
39 imposes a dosage problem on expression of X-linked genes. In the absence of a proper  
40 regulatory mechanism, this imparity potentially leads to unequal expression of X-linked  
41 genes and sex lethality. To overcome this challenge, a “dosage compensation”  
42 mechanism is evolved to compensate the expression of X chromosomes<sup>1-3</sup>. In  
43 *Drosophila*, the one copy of X-chromosome in males is roughly transcribed by two-  
44 fold to balance the expression of the two X chromosomes in females<sup>4-7</sup>. In mammals,  
45 an X chromosome in females is primarily inactivated to balance the expression of X-  
46 linked genes with males<sup>8-10</sup>. Moreover, mammalian X chromosome is further hyper-  
47 transcribed in order to satisfy X-Autosome expression ratio<sup>11,12</sup>.

48         Recent studies in *Drosophila* and mammals using chromatin  
49 immunoprecipitation and global-run-on sequencing (i.e., ChIP-seq and GRO-seq) have  
50 addressed the interference of dosage compensation with Pol II transcription at different  
51 steps. In mouse embryonic stem cells (ES cells), dosage compensation is shown to  
52 increase Pol II densities at initiation (i.e., phosphorylated Pol II at Serine 5, i.e., Pol  
53 II-S5P) without significant changes in the elongated form of Pol II (i.e.,  
54 phosphorylated Pol II at Serine 2 or Pol II-S2P)<sup>13</sup>. In another study of dosage  
55 compensation in mouse female embryonic kidney fibroblasts, both Pol II-S5P and  
56 PolII-S2P densities were found enhanced<sup>12</sup>. In *Drosophila*, whether dosage  
57 compensation facilitates Pol II progression across active X-linked genes<sup>14</sup> or enhance  
58 recruitment of Pol II to promoters<sup>15</sup> has been controversial<sup>16-18</sup>.

59         From the above-mentioned experimental studies, one emerging pattern is a non-  
60 linear relationship between Pol II densities at different steps of transcription and mRNA  
61 expression level**Error! Bookmark not defined.** In *Drosophila*, Pol II tag density

62 over the bodies of X-linked genes compared to autosomal genes is shown to differ by  
63 a factor of  $\sim 1.4^{14}$  with  $\sim 1.2$  folds increase at promoters<sup>17</sup>. In the case of X chromosome  
64 up-regulation in mammals, Pol II at promoters and along the body of active genes was  
65 reported to be increased by  $\sim 1.3$  and  $\sim 1.2$  fold respectively<sup>12</sup>. In both examples, mRNA  
66 levels are increased by  $\sim$ two-fold upon hyper transcription. How does an  $\sim 30\%$  increase  
67 in Pol II density gives rises to  $\sim 200\%$  increase in mRNA production?

68 Here, we justify this non-linear relationship based on multi-step regulation of  
69 transcription machinery. Our assumption is that dosage compensation is achieved by  
70 proper alterations of different steps of Pol II transcription. We use the following kinetic  
71 framework for Pol II transcription (Figure 1A):

$$72 \quad \frac{d[P_{pic}]}{dt} = -k_{ini}[P_{pic}] + k_{on}[P_{free}] - k_{off}[P_{pic}] \quad (1)$$

$$73 \quad \frac{d[P_{ini}]}{dt} = k_{ini}[P_{pic}] - k_{esc}[P_{ini}] - k_{abor}[P_{ini}] \quad (2)$$

$$74 \quad \frac{d[P_{eng}]}{dt} = k_{esc}[P_{ini}] - k_{term}[P_{eng}] \quad (3)$$

$$75 \quad \frac{d[P_{free}]}{dt} = k_{abor}[P_{ini}] + k_{term}[P_{eng}] - k_{on}[P_{free}] + k_{off}[P_{pic}] \quad (4)$$

$$76 \quad \frac{d[mRNA]}{dt} = k_{term}[P_{eng}] - k_{exp}[mRNA] \quad (5)$$

77 Equations 1-5 describe dynamics of Pol II at different transcriptional steps (i.e.,  
78 in pre-initiation complex,  $P_{pic}$ , at initiation,  $P_{ini}$ , engaged to gene bodies,  $P_{eng}$ , and as  
79 free molecules,  $P_{free}$ ) and mRNA molecules. In this framework, free Pol II molecules  
80 bind to and unbound from promoters with the rate constants  $k_{on}$  and  $k_{off}$  and proceed to  
81 initiation and elongation with the rate constants of  $k_{ini}$  and  $k_{esc}$ . In addition to  
82 termination described by the rate constant  $k_{term}$ , Pol II transcription is stopped by  
83 abortive initiation with the rate constant  $k_{abor}$ . We modeled mRNA production and  
84 clearance by the term  $(k_{term}[P_{eng}] - k_{exp}[mRNA])$  simplifying splicing and mRNA  
85 export out of nucleus into one rate constant,  $k_{exp}$ .

86 At steady-states, the relation between steady state mRNA expression and Pol II  
87 abundance at different steps of transcription can be expressed as:

$$88 \quad \frac{[mRNA]_{ss}}{[P_{eng}]_{ss}} = \frac{k_{term}}{k_{exp}} \quad (6)$$

$$89 \quad \frac{[mRNA]_{ss}}{[P_{ini}]_{ss}} = \frac{k_{esc}}{k_{exp}} \quad (7)$$

$$90 \quad \frac{[mRNA]_{ss}}{[P_{pic}]_{ss}} = \frac{k_{esc}}{k_{exp}} \left( \frac{k_{ini}}{k_{esc} + k_{abor}} \right) \quad (8)$$

91 The ratios of Pol II abundances at different steps upon up-regulation (denoted  
92 by an “Up” superscript) to the original system are written as:

$$93 \quad P_{eng} \text{ fold change} \equiv \frac{[P_{eng}]_{ss}^{Up}}{[P_{eng}]_{ss}} = \frac{[mRNA]_{ss}^{Up}}{[mRNA]_{ss}} \times \frac{\left(\frac{k_{exp}}{k_{term}}\right)^{Up}}{\left(\frac{k_{exp}}{k_{term}}\right)} \quad (9)$$

$$94 \quad P_{ini} \text{ fold change} \equiv \frac{[P_{ini}]_{ss}^{Up}}{[P_{ini}]_{ss}} = \frac{[mRNA]_{ss}^{Up}}{[mRNA]_{ss}} \times \frac{\left(\frac{k_{exp}}{k_{esc}}\right)^{Up}}{\left(\frac{k_{exp}}{k_{esc}}\right)} \quad (10)$$

$$95 \quad P_{pic} \text{ fold change} \equiv \frac{[P_{pic}]_{ss}^{Up}}{[P_{pic}]_{ss}} = \frac{[mRNA]_{ss}^{Up}}{[mRNA]_{ss}} \times \frac{\left\{ \frac{k_{exp}(k_{esc} + k_{abor})}{k_{esc}k_{ini}} \right\}^{Up}}{\left\{ \frac{k_{exp}(k_{esc} + k_{abor})}{k_{esc}k_{ini}} \right\}} \quad (11)$$

96 From equations 9 to 11, any change in Pol II abundance is proportional to  
97 mRNA fold change (i.e.,  $\frac{[mRNA]_{ss}^{Up}}{[mRNA]_{ss}}$ ) scaled with the ratio of up-regulated rate constants

98 to the original ones (e.g.,  $\frac{\left(\frac{k_{exp}}{k_{term}}\right)^{Up}}{\left(\frac{k_{exp}}{k_{term}}\right)}$  in the case of  $P_{eng}$  fold change). To calculate the left

99 sides of equations 9-11 and to check whether we can reckon the experimentally  
100 observed increased Pol II density at promoters and along the gene bodies, we calculated  
101 values of new rate constants assuming two-fold up-regulation. Theoretically, up-  
102 regulation can be modeled by one-step (i.e., changing one rate constant), two-step or  
103 multi-step perturbation to the original transcription system defined by equations 1-5.

104 Once dosage compensation was achieved (i.e.,  $[mRNA]_{ss}^{Up} = 2 [mRNA]_{ss}$ ), the new  
105 rate constants were used to calculate the fold changes in Pol II density at different stages

106 of transcription using equations 9 to 11. We employed *in vivo* estimates of Pol II  
107 transcription rate constants in mammalian cells (See Table S1 for parameters used in  
108 the model)<sup>19</sup> and for simplicity assumed no change in mRNA export rate upon dosage  
109 compensation (i.e.,  $k_{exp}^{Up} = k_{exp}$ ).

110         Perturbing one transcription step to achieve two-fold mRNA production linearly  
111 increases Pol II abundance in subsequent steps (See Table S2). For example, increasing  
112 the rate of initiation (i.e., by increasing  $k_{ini}$ ) results in increased densities of  $P_{ini}$ , and  
113  $P_{eng}$ . However, two-step perturbation of transcription machinery causes less than two-  
114 folds increase in abundance of Pol II at any step which its production and clearance rate  
115 are increased simultaneously (See Table S3 and Figures S1-S10 for details). Figure 1B  
116 shows mRNA fold change as a function of  $k_{ini}$  and  $k_{esc}$ . The intersection of the plane  
117  $\frac{[mRNA]_{ss}'}{[mRNA]_{ss}} = 2$  with 3D curve of mRNA fold change defines a dosage compensation  
118 surface where combinations of  $k_{ini}$  and  $k_{esc}$  result in two-fold hyper transcription. From  
119 the figure, mRNA production is doubled by increasing initiation and promoter-escape  
120 rate by ~1.2 to 2 folds, simultaneously. However, as shown in Figure 1C,  $P_{ini}$  is clearly  
121 enriched less than two fold when  $k_{ini}$  and  $k_{esc}$  are changed at the same time. Given the  
122 original kinetic rate constants, ~30% increase in  $P_{ini}$  corresponds to two-fold mRNA  
123 production. A similar situation holds for  $P_{eng}$  when  $k_{esc}$  and  $k_{term}$  are perturbed at the  
124 same time (Figures 1D and 1E). An ~20% increase in Pol II abundance along the gene  
125 bodies is associated with two-fold mRNA production.

126         Although perturbing initiation and promoter-escape rates gives rises to  $P_{ini}$  fold  
127 changes in agreement with experimentally observed values,  $P_{eng}$  is increased by ~two-  
128 fold (See Table S3 for Pol II abundance at gene bodies while  $k_{ini}$  and  $k_{esc}$  are perturbed).  
129 We thus checked a three-step perturbation analysis and found a combination of  $k_{ini}$ ,  $k_{esc}$

130 and  $k_{\text{term}}$  that satisfies ~10% to 30% increase in  $P_{\text{ini}}$  and gene bodies upon dosage  
131 compensation (See Table S4 and S5 for details).

132         Next, we asked whether multi-step regulation of transcription can account for  
133 two-fold mRNA expression while  $P_{\text{ini}}$  is unaffected. In Figure 1F, red and blue 3D  
134 curves show mRNA and  $P_{\text{ini}}$  fold changes as functions of  $k_{\text{ini}}$  and  $k_{\text{esc}}$ . The intersection  
135 of mRNA 3D curve with the plane at fold change=2 defines a 2D curve for dosage  
136 compensation which is projected on  $k_{\text{ini}}-k_{\text{esc}}$  plane in Figure 1F. We also projected the  
137 intersection of 3D  $P_{\text{ini}}$  levels with the plane at fold change=1 in blue. These two curves  
138 crossed each other at  $k_{\text{esc}}^{\text{Up}} \sim 2k_{\text{esc}}$  and  $k_{\text{ini}}^{\text{Up}} \sim 1.2k_{\text{ini}}$  causing two-fold mRNA  
139 production and insignificant changes in  $P_{\text{ini}}$  levels. This condition corresponds to an  
140 expected ChIP profile in Figure 1G which is most likely misinterpreted as no change in  
141 Pol II densities at initiation and a significant change in Pol II densities at elongation  
142 steps, although both steps have been enhanced (schema in Figure 1H). In line with  
143 previous studies on erroneous inferences from ChIP profiles<sup>20</sup> and inapplicability of  
144 ChIP-seq and Gro-seq in study of Pol II turnover<sup>21</sup>, our study systematically shows the  
145 limitation of these methods in addressing relevance of Pol II enrichment at different  
146 transcription steps.

147         Taken these together, our theoretical approach suggests that Pol II transcription  
148 is most likely regulated at multiple steps in dosage compensation. How is a multi-step  
149 regulation modulated by DCC? There is compelling evidence that DCC proteins,  
150 individually or in synergy, influence different transcription steps<sup>22</sup>. For example, in  
151 mammals it is shown that MSL1 and MOF, two members of DCC complex, contribute  
152 to enhanced densities of Pol II-S5P and therefore facilitates initiation<sup>13</sup>. In addition,  
153 MOF as an acetyltransferase is responsible for H4K16ac, a histon modification which  
154 decompacts nucleosomes and enhanced promoter-escape and transcriptional

155 elongation<sup>14,18</sup>. As we showed in this work, enhancing initiation, promoter-escape and  
156 elongation rates suffice to explain the nonlinearity between Pol II levels and mRNA  
157 expression.

158         The changes in kinetic constants are essential in reproducing the patterns of Pol  
159 II transcriptional regulation as shown in this work. Two approaches can be used to  
160 measure and compare kinetic rate constants. First, fluorescence recovery after  
161 photobleaching (FRAP) experiments<sup>19</sup> can be used to infer kinetic rate constants of Pol  
162 II transcription in selected X-linked and autosomal genes in *Drosophila* or in  
163 mammalian cells. Second, following the work by Kim and Marioni<sup>23</sup>, kinetic rate  
164 constants can be inferred from RNA-seq data of Pol II transcription at individual steps.  
165 We anticipate future experiments to address these issues.

166

#### 167 **Acknowledgement**

168 Author is grateful to professor Asifa Akhtar and Max Planck Society for providing a  
169 research fellowship in Max Planck Institute for Immunobiology and Epigenetics,  
170 Freiburg, Germany.

171

172

173

174

175

176

177

178

179

180

181

182 **References**

- 183 1. Meyer, B.J. X-Chromosome dosage compensation. (2005).  
184 2. Akhtar, A. Dosage compensation: an intertwined world of RNA and  
185 chromatin remodelling. *Current opinion in genetics & development* **13**, 161-  
186 169 (2003).  
187 3. Conrad, T. & Akhtar, A. Dosage compensation in *Drosophila melanogaster*:  
188 epigenetic fine-tuning of chromosome-wide transcription. *Nature reviews.*  
189 *Genetics* **13**, 123 (2012).  
190 4. Prestel, M., Feller, C., Straub, T., Mitlöhner, H. & Becker, P.B. The activation  
191 potential of MOF is constrained for dosage compensation. *Molecular cell* **38**,  
192 815-826 (2010).  
193 5. Hamada, F.N., Park, P.J., Gordadze, P.R. & Kuroda, M.I. Global regulation of  
194 X chromosomal genes by the MSL complex in *Drosophila melanogaster*.  
195 *Genes & development* **19**, 2289-2294 (2005).  
196 6. Straub, T., Gilfillan, G.D., Maier, V.K. & Becker, P.B. The *Drosophila* MSL  
197 complex activates the transcription of target genes. *Genes & development* **19**,  
198 2284-2288 (2005).  
199 7. Park, S.-W., Oh, H., Lin, Y.-R. & Park, Y. MSL cis-spreading from roX gene  
200 up-regulates the neighboring genes. *Biochemical and biophysical research*  
201 *communications* **399**, 227-231 (2010).  
202 8. Ohno, S., Kaplan, W. & Kinosita, R. Formation of the sex chromatin by a  
203 single X-chromosome in liver cells of *Rattus norvegicus*. *Experimental cell*  
204 *research* **18**, 415-418 (1959).  
205 9. Lyon, M.F. Gene action in the X-chromosome of the mouse (*Mus musculus*  
206 L.). *nature* **190**, 372-373 (1961).  
207 10. Gartler, S.M. & Riggs, A.D. Mammalian X-chromosome inactivation. *Annual*  
208 *review of genetics* **17**, 155-190 (1983).  
209 11. Disteche, C.M. Dosage compensation of the active X chromosome in  
210 mammals. *Nature genetics* **38**, 47 (2006).  
211 12. Yildirim, E., Sadreyev, R.I., Pinter, S.F. & Lee, J.T. X-chromosome  
212 hyperactivation in mammals via nonlinear relationships between chromatin  
213 states and transcription. *Nature structural & molecular biology* **19**, 56-61  
214 (2012).  
215 13. Deng, X. *et al.* Mammalian X upregulation is associated with enhanced  
216 transcription initiation, RNA half-life, and MOF-mediated H4K16 acetylation.  
217 *Developmental cell* **25**, 55-68 (2013).  
218 14. Larschan, E. *et al.* X chromosome dosage compensation via enhanced  
219 transcriptional elongation in *Drosophila*. *Nature* **471**, 115 (2011).  
220 15. Conrad, T., Cavalli, F.M., Vaquerizas, J.M., Luscombe, N.M. & Akhtar, A.  
221 *Drosophila* dosage compensation involves enhanced Pol II recruitment to male  
222 X-linked promoters. *Science* **337**, 742-746 (2012).  
223 16. Ferrari, F. *et al.* Comment on “*Drosophila* dosage compensation involves  
224 enhanced Pol II recruitment to male X-linked promoters”. *Science (New York,*  
225 *N.Y.)* **340**, 273-273 (2013).



- 226 17. Vaquerizas, J.M., Cavalli, F.M., Conrad, T., Akhtar, A. & Luscombe, N.M.  
227 Response to comments on “Drosophila dosage compensation involves  
228 enhanced Pol II recruitment to male X-Linked promoters”. *Science* **340**, 273-  
229 273 (2013).
- 230 18. Ferrari, F. *et al.* “Jump start and gain” model for dosage compensation in  
231 Drosophila based on direct sequencing of nascent transcripts. *Cell reports* **5**,  
232 629-636 (2013).
- 233 19. Darzacq, X. *et al.* In vivo dynamics of RNA polymerase II transcription.  
234 *Nature structural & molecular biology* **14**, 796-806 (2007).
- 235 20. Ehrensberger, A.H., Kelly, G.P. & Svejstrup, J.Q. Mechanistic interpretation  
236 of promoter-proximal peaks and RNAPII density maps. *Cell* **154**, 713-715  
237 (2013).
- 238 21. Henriques, T. *et al.* Stable pausing by RNA polymerase II provides an  
239 opportunity to target and integrate regulatory signals. *Molecular cell* **52**, 517-  
240 528 (2013).
- 241 22. Chlamydas, S. *et al.* Functional interplay between MSL1 and CDK7 controls  
242 RNA polymerase II Ser5 phosphorylation. *Nature* **201**, 6 (2016).
- 243 23. Kim, J.K. & Marioni, J.C. Inferring the kinetics of stochastic gene expression  
244 from single-cell RNA-sequencing data. *Genome biology* **14**, R7 (2013).  
245

246

247

248

249

250

251

252

253

254

255

256

257

258

259

260

261

262 **Figure legends**

263 **Figure 1.** A) RNA polymerase II transcription can be perturbed at different steps  
264 (equations 1-6) to give two-fold mRNA production. In B) 3D curve for mRNA fold  
265 change is represented as a function of initiation,  $k_{ini}$ , and promoter-escape,  $k_{esc}$ , rate  
266 constants. C) 3D curve for  $P_{ini}$  fold changes as a function of  $k_{ini}$  and  $k_{esc}$ . D) mRNA fold  
267 change as a function of  $k_{esc}$  and elongation-termination rate constant,  $k_{term}$ . E) 3D curve  
268 for  $P_{eng}$  change as a function of  $k_{esc}$  and  $k_{term}$ . F) 3D curves for fold changes in mRNA  
269 (red) and  $P_{ini}$  (blue) are crossed with fold change=2 and fold change=1 planes  
270 respectively with their projection onto a 2D  $k_{ini}$ -  $k_{esc}$  plane shown in red and blue. G)  
271 ChIP profile for Pol II transcription can be misinterpreted as no significant change in  
272  $P_{ini}$  and significant changes in  $P_{eng}$  while, as shown schematically in H) both  $k_{ini}$  and  
273  $k_{esc}$  are increased at the same time.

274

275

276

277

278

279

280

281

282

283

284

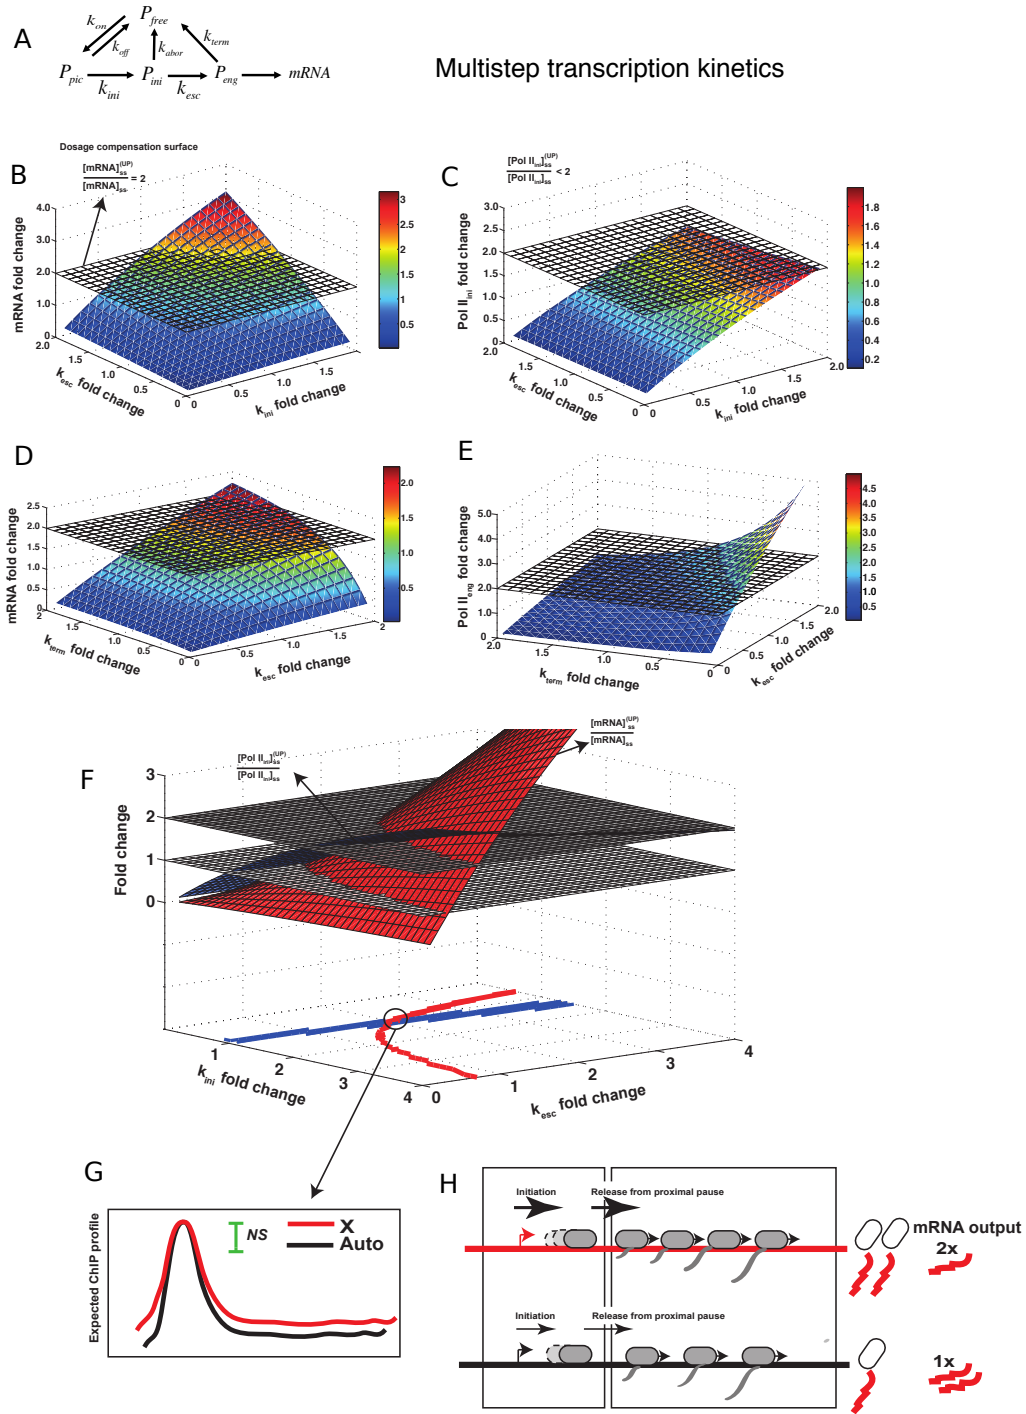

285

286

287

## Supplementary information

### Multi-step Transcriptional Regulation Explains Non-linear Relation between RNA polymerase II transcription and mRNA expression in Dosage Compensation

Pouria Dasmeh<sup>1,2,3</sup>

<sup>1</sup>Departement de Biochimie, <sup>2</sup>Centre Robert Cedergren en Bioinformatique et Génomique, Université de Montréal, 2900 Edouard-Montpetit, Montreal, Quebec H3T 1J4, Canada. <sup>3</sup>Department of Chemistry and Chemical Biology, Harvard University, Cambridge, MA USA 02139.

**Table S1.** Kinetic constants used in the kinetic model for POL-II transcription.

| Parameter                      | Symbol     | Value                                   |
|--------------------------------|------------|-----------------------------------------|
| Promoter binding constant      | $k_{on}$   | 0.003 (s <sup>-1</sup> ) <sup>a</sup>   |
| Promoter dissociation constant | $k_{off}$  | 0.145 (s <sup>-1</sup> ) <sup>b</sup>   |
| Initiation constant            | $k_{ini}$  | 0.0216 (s <sup>-1</sup> ) <sup>b</sup>  |
| Promoter escape constant       | $k_{esc}$  | 0.00159 (s <sup>-1</sup> ) <sup>b</sup> |
| Abortive initiation constant   | $k_{abor}$ | 0.0176 (s <sup>-1</sup> ) <sup>b</sup>  |
| Termination constant           | $k_{term}$ | 0.0016 (s <sup>-1</sup> ) <sup>b</sup>  |

a: Taken from<sup>1</sup>, b: Taken from<sup>2</sup>

**Table S2.** The fold change of POL-II at promoters, initiation and engaged phase in dosage compensated genes ( $1.8 < mRNA \text{ fold change} < 2.2$ ) caused by relative changes in each kinetic constant

| Kinetic constant | $P_{prom}$ fold change | $P_{ini}$ fold change | $P_{eng}$ fold change |
|------------------|------------------------|-----------------------|-----------------------|
| $k_{on}$         | 1.86                   | 1.86                  | 1.86                  |
| $k_{off}$        | 1.98                   | 1.98                  | 1.99                  |
| $k_{ini}$        | 0.82                   | 1.96                  | 1.97                  |

|            |      |       |      |
|------------|------|-------|------|
| $k_{esc}$  | 0.99 | 0.895 | 1.98 |
| $k_{abor}$ | 0.96 | 2.13  | 2.07 |
| $k_{term}$ | 1.01 | 1.01  | 0.18 |

**Table S3.** Results of the fold change of POL-II at promoters, initiation and engaged phase in dosage compensated genes (X-chromosome) when  $1.8 < mRNA$  fold change  $< 2.2$ .

| <b>Kinetic constants</b>    | <b><math>P_{prom}</math> fold change</b> | <b><math>P_{ini}</math> fold change</b> | <b><math>P_{eng}</math> fold change</b> |
|-----------------------------|------------------------------------------|-----------------------------------------|-----------------------------------------|
| $(k_{on} \cdot k_{off})$    | $1.8897 \pm 0.0553$                      | $1.8901 \pm 0.0551$                     | $1.8935 \pm 0.0553$                     |
| $(k_{on} \cdot k_{ini})$    | $1.3522 \pm 0.3056$                      | $1.8699 \pm 0.0560$                     | $1.8736 \pm 0.0564$                     |
| $(k_{on} \cdot k_{abor})$   | $1.3272 \pm 0.4825$                      | $1.9535 \pm 0.1079$                     | $1.9484 \pm 0.0942$                     |
| $(k_{on} \cdot k_{esc})$    | $1.4071 \pm 0.2729$                      | $1.3630 \pm 0.2978$                     | $1.8853 \pm 0.0620$                     |
| $(k_{on} \cdot k_{term})$   | $1.7088 \pm 0.1113$                      | $1.7090 \pm 0.1117$                     | $1.2911 \pm 0.3626$                     |
| $(k_{off} \cdot k_{ini})$   | $1.6044 \pm 0.7755$                      | $1.8754 \pm 0.0594$                     | $1.8787 \pm 0.0597$                     |
| $(k_{off} \cdot k_{abor})$  | $1.5792 \pm 0.8715$                      | $1.9416 \pm 0.0857$                     | $1.9385 \pm 0.0791$                     |
| $(k_{off} \cdot k_{esc})$   | $1.5663 \pm 0.6070$                      | $1.5378 \pm 0.6631$                     | $1.8776 \pm 0.0612$                     |
| $(k_{off} \cdot k_{term})$  | $1.9427 \pm 0.5479$                      | $1.9436 \pm 0.5502$                     | $2.1496 \pm 1.9574$                     |
| $(k_{ini} \cdot k_{abor})$  | $0.9239 \pm 0.0546$                      | $1.9479 \pm 0.1303$                     | $1.9424 \pm 0.1145$                     |
| $(k_{ini} \cdot k_{esc})$   | $0.9234 \pm 0.0382$                      | $1.2905 \pm 0.2435$                     | $1.8928 \pm 0.0628$                     |
| $(k_{ini} \cdot k_{term})$  | $0.8893 \pm 0.0149$                      | $1.6436 \pm 0.0662$                     | $1.0716 \pm 0.1921$                     |
| $(k_{abor} \cdot k_{esc})$  | $0.9699 \pm 0.0199$                      | $1.6007 \pm 0.9280$                     | $1.9138 \pm 0.0656$                     |
| $(k_{abor} \cdot k_{term})$ | $0.9601 \pm 0.0393$                      | $1.9707 \pm 0.4837$                     | $2.0232 \pm 1.5044$                     |
| $(k_{esc} \cdot k_{term})$  | $0.9978 \pm 0.0057$                      | $0.9345 \pm 0.0148$                     | $1.1898 \pm 0.3057$                     |

**Table S4.** Different combinations of rate constants which satisfy  $1.1 < P_{eng}$  fold change  $< 1.3$ .  $1.1 < P_{ini}$  fold change  $< 1.3$  and  $1.1 < P_{prom}$  fold change  $< 1.3$ .

| <b><math>k_{ini}</math> (fold increase)</b> | <b><math>k_{esc}</math> (fold increase)</b> | <b><math>k_{term}</math> (fold increase)</b> |
|---------------------------------------------|---------------------------------------------|----------------------------------------------|
| 1.2                                         | 1.5                                         | 1.3                                          |
| 1.2                                         | 1.5                                         | 1.4                                          |
| 1.2                                         | 1.5                                         | 1.5                                          |
| 1.2                                         | 1.6                                         | 1.3                                          |
| 1.2                                         | 1.6                                         | 1.4                                          |
| 1.2                                         | 1.6                                         | 1.5                                          |
| 1.2                                         | 1.6                                         | 1.6                                          |
| 1.3                                         | 1.4                                         | 1.3                                          |
| 1.3                                         | 1.4                                         | 1.4                                          |
| 1.3                                         | 1.4                                         | 1.5                                          |
| 1.3                                         | 1.5                                         | 1.4                                          |
| 1.3                                         | 1.5                                         | 1.5                                          |
| 1.3                                         | 1.5                                         | 1.6                                          |
| 1.3                                         | 1.6                                         | 1.4                                          |
| 1.3                                         | 1.6                                         | 1.5                                          |
| 1.3                                         | 1.6                                         | 1.6                                          |
| 1.4                                         | 1.3                                         | 1.3                                          |
| 1.4                                         | 1.3                                         | 1.4                                          |
| 1.4                                         | 1.3                                         | 1.5                                          |
| 1.4                                         | 1.4                                         | 1.4                                          |
| 1.4                                         | 1.4                                         | 1.5                                          |
| 1.4                                         | 1.4                                         | 1.6                                          |

|     |     |     |
|-----|-----|-----|
| 1.4 | 1.5 | 1.4 |
| 1.4 | 1.5 | 1.5 |
| 1.4 | 1.5 | 1.6 |
| 1.5 | 1.2 | 1.4 |
| 1.5 | 1.2 | 1.5 |
| 1.5 | 1.3 | 1.3 |
| 1.5 | 1.3 | 1.4 |
| 1.5 | 1.3 | 1.5 |
| 1.5 | 1.3 | 1.6 |
| 1.5 | 1.4 | 1.4 |
| 1.5 | 1.4 | 1.5 |
| 1.5 | 1.4 | 1.6 |

The correlations between the kinetic constants and POL-II abundance at different stages of transcription are shown in Table S5.

**Table S5.** The correlations (+) or anticorrelation (-) between rate constants and POL-II abundance at different stages of transcription.

| <b>Parameter</b>  | $P_{\text{prom}}$ | $P_{\text{ini}}$ | $P_{\text{prom}}+P_{\text{ini}}$ | $P_{\text{eng}}$ |
|-------------------|-------------------|------------------|----------------------------------|------------------|
| $k_{\text{on}}$   | +                 | +                | +                                | +                |
| $k_{\text{off}}$  | -                 | -                | -                                | -                |
| $k_{\text{ini}}$  | -                 | +                | +                                | +                |
| $k_{\text{abor}}$ | +                 | -                | -                                | -                |
| $k_{\text{esc}}$  | -                 | -                | -                                | +                |
| $k_{\text{term}}$ | +                 | +                | +                                | -                |

In the following figures, the effect of increase or decrease in rate constants on mRNA production is quantified in terms of *mRNA ratio* defined as:

$$mRNA\ ratio = \frac{[mRNA](perturbed\ rate\ constants)}{[mRNA](original\ rate\ constants)} \quad (6)$$

Other abundance ratios defined in this work (e.g.,  $P_{prom}$  ratio) are calculated similarly

(i.e.,  $P_{prom}\ ratio = \frac{[P_p](perturbed\ rate\ constants)}{[P_p](original\ rate\ constants)}$ ).

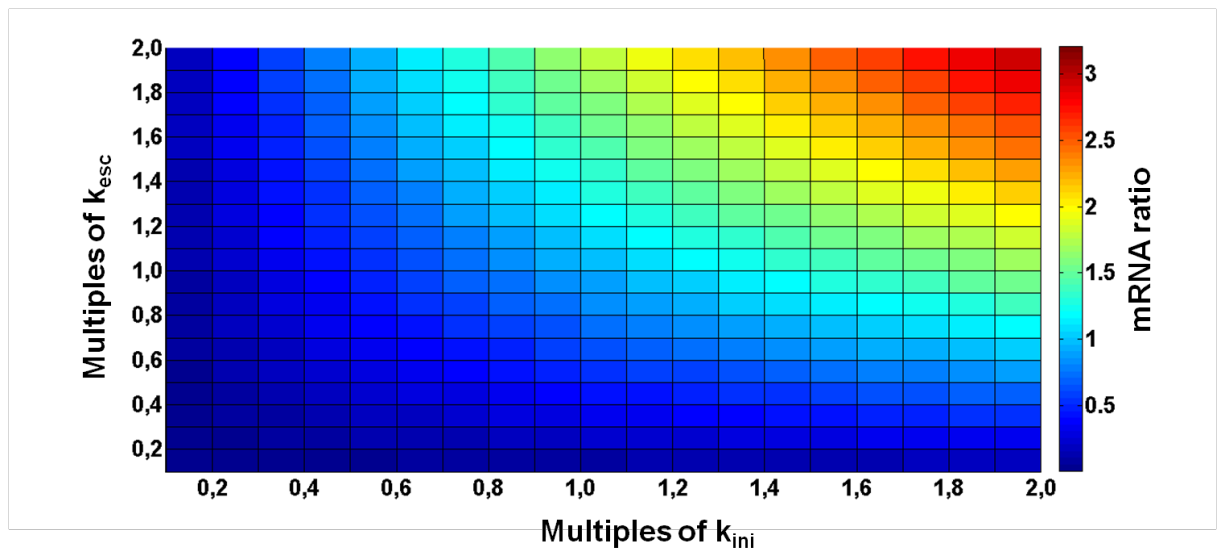

**Figure S1.** *mRNA* fold change as a function of varying  $k_{ini}$  and  $k_{esc}$  from one-tenth to two-fold of their original values (i.e.,  $k_{ini}=0.0216\ s^{-1}$  and  $k_{esc}=0.00159\ s^{-1}$ ).



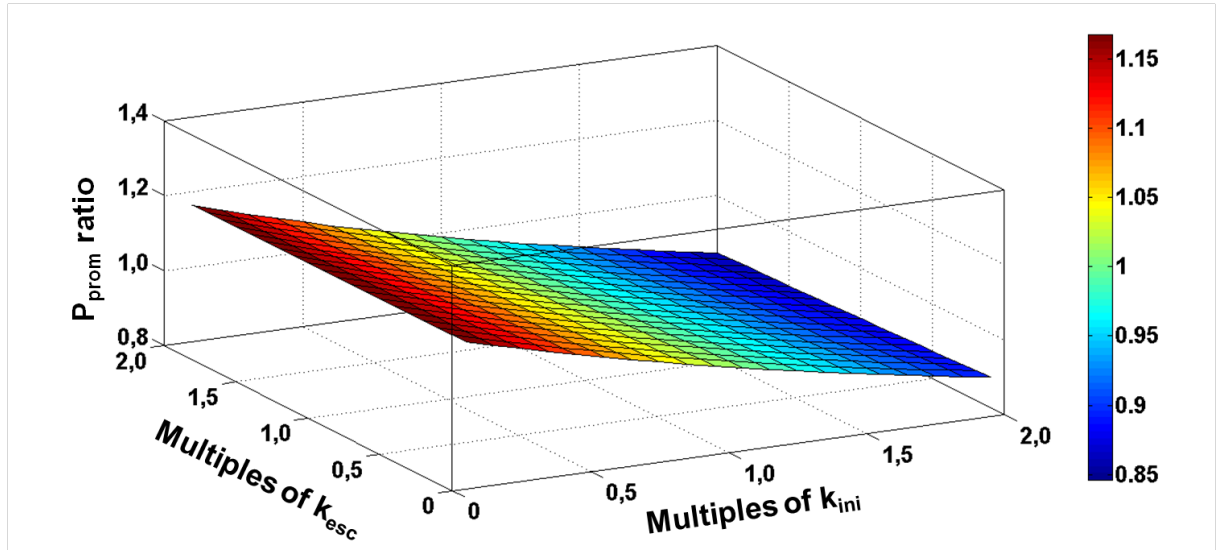

**Figure S2.**  $P_{\text{prom}}$  fold change as a function of varying  $k_{\text{ini}}$  and  $k_{\text{esc}}$  from one-tenth to two-fold of their original values (i.e.,  $k_{\text{ini}}=0.0216 \text{ s}^{-1}$  and  $k_{\text{esc}}=0.00159 \text{ s}^{-1}$ ).

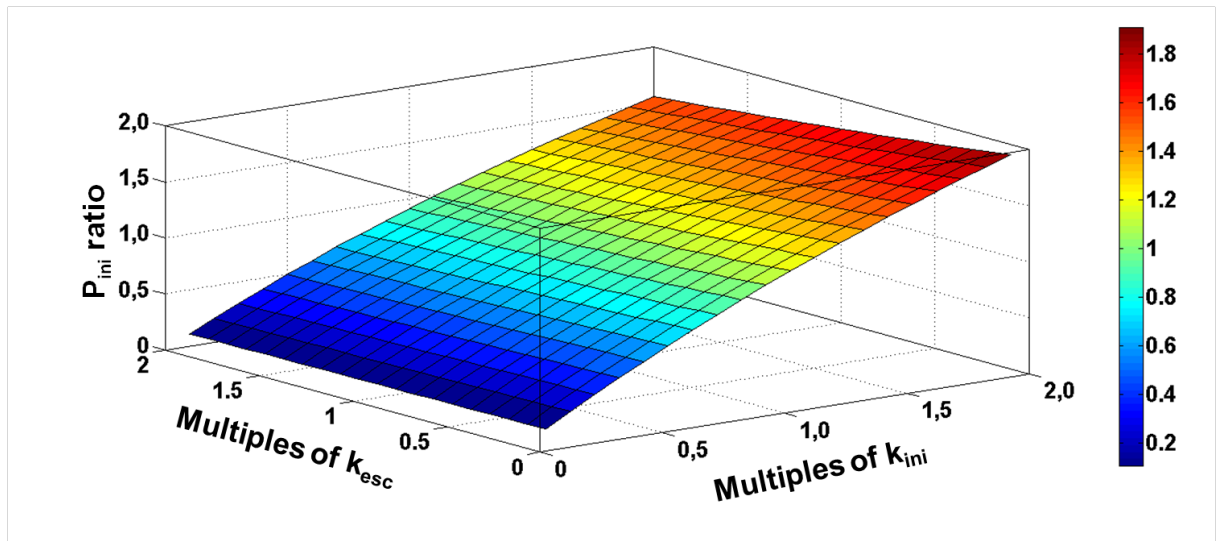

**Figure S3.**  $P_{\text{ini}}$  fold change as a function of varying  $k_{\text{ini}}$  and  $k_{\text{esc}}$  from one-tenth to two-fold of their original values (i.e.,  $k_{\text{ini}}=0.0216 \text{ s}^{-1}$  and  $k_{\text{esc}}=0.00159 \text{ s}^{-1}$ ).

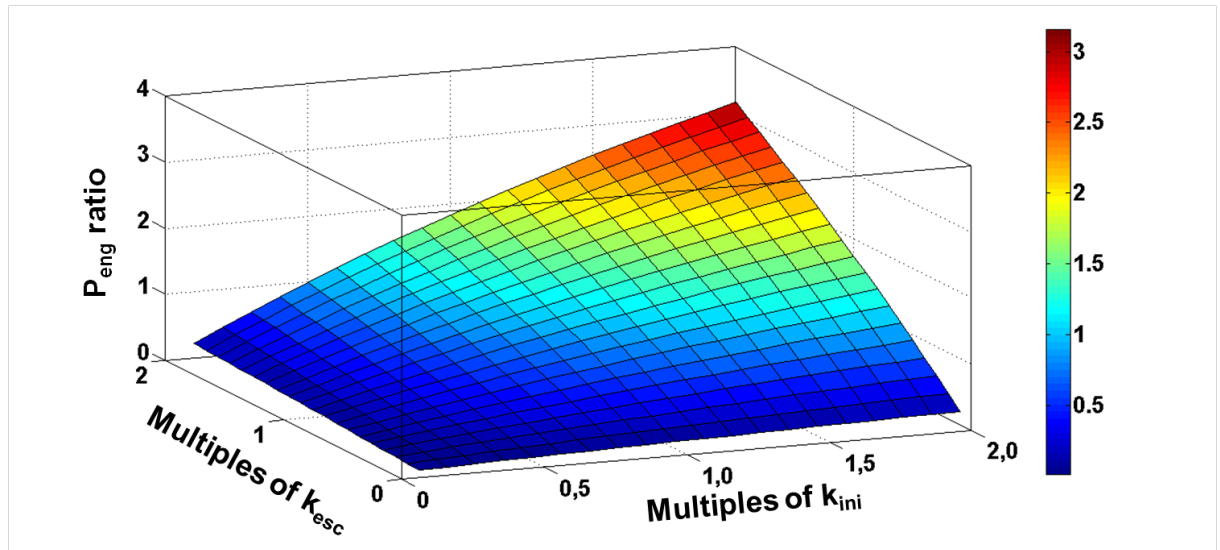

**Figure S4.**  $P_{eng}$  fold change as a function of varying  $k_{ini}$  and  $k_{esc}$  from one-tenth to two-fold of their original values (i.e.,  $k_{ini}=0.0216 \text{ s}^{-1}$  and  $k_{esc}=0.00159 \text{ s}^{-1}$ ).

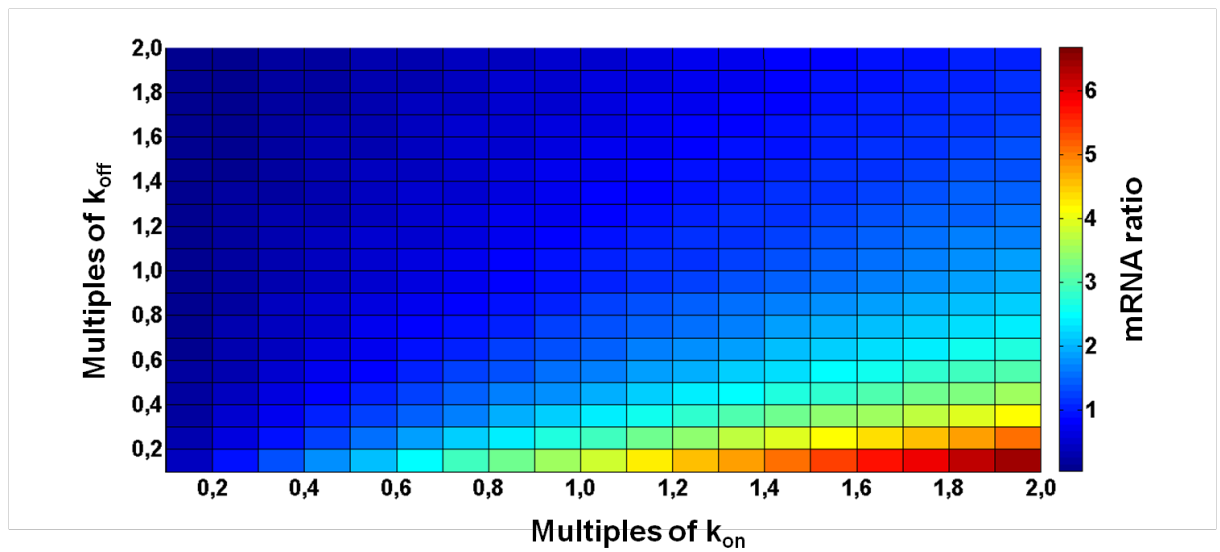

**Figure S5.** mRNA fold change as a function of varying  $k_{on}$  and  $k_{off}$  from one-tenth to two-fold of their original values (i.e.,  $k_{on}=0.0216 \text{ s}^{-1}$  and  $k_{off}=0.00159 \text{ s}^{-1}$ ).

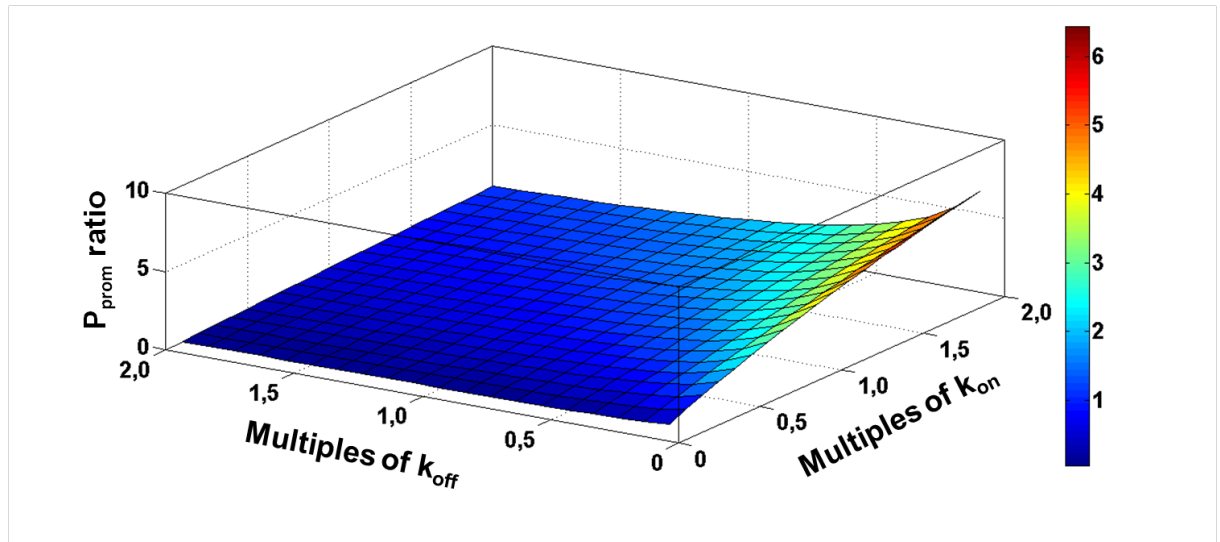

**Figure S5.**  $P_{\text{prom}}$  fold change as a function of varying  $k_{\text{on}}$  and  $k_{\text{off}}$  from one-tenth to two-fold of their original values (i.e.,  $k_{\text{on}}=0.0216 \text{ s}^{-1}$  and  $k_{\text{off}}=0.00159 \text{ s}^{-1}$ ).

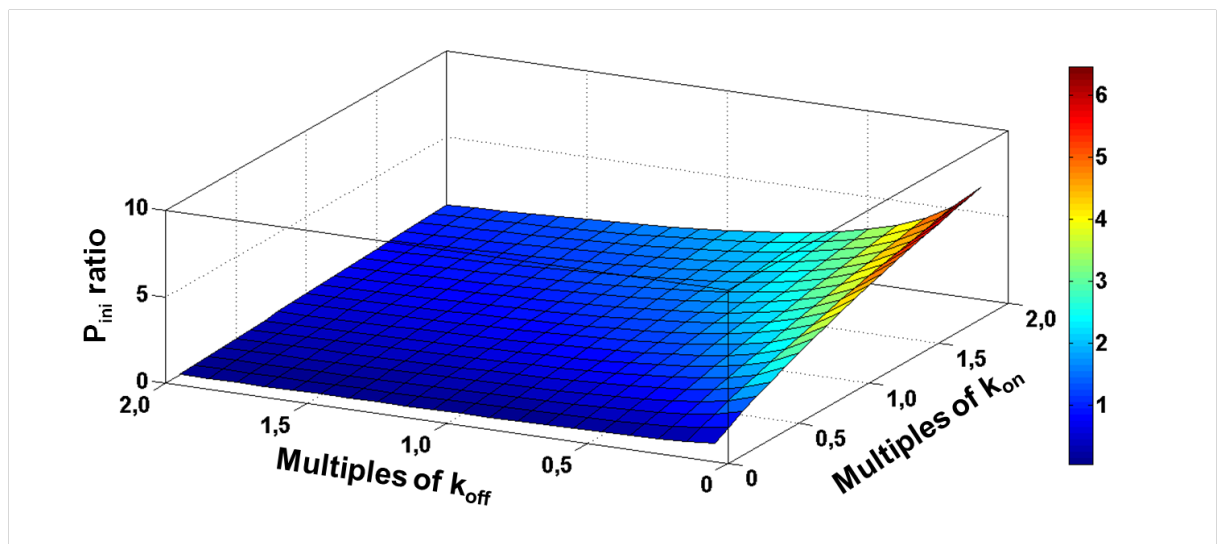

**Figure S6.**  $P_{\text{ini}}$  fold change as a function of varying  $k_{\text{on}}$  and  $k_{\text{off}}$  from one-tenth to two-fold of their original values (i.e.,  $k_{\text{on}}=0.0216 \text{ s}^{-1}$  and  $k_{\text{off}}=0.00159 \text{ s}^{-1}$ ).

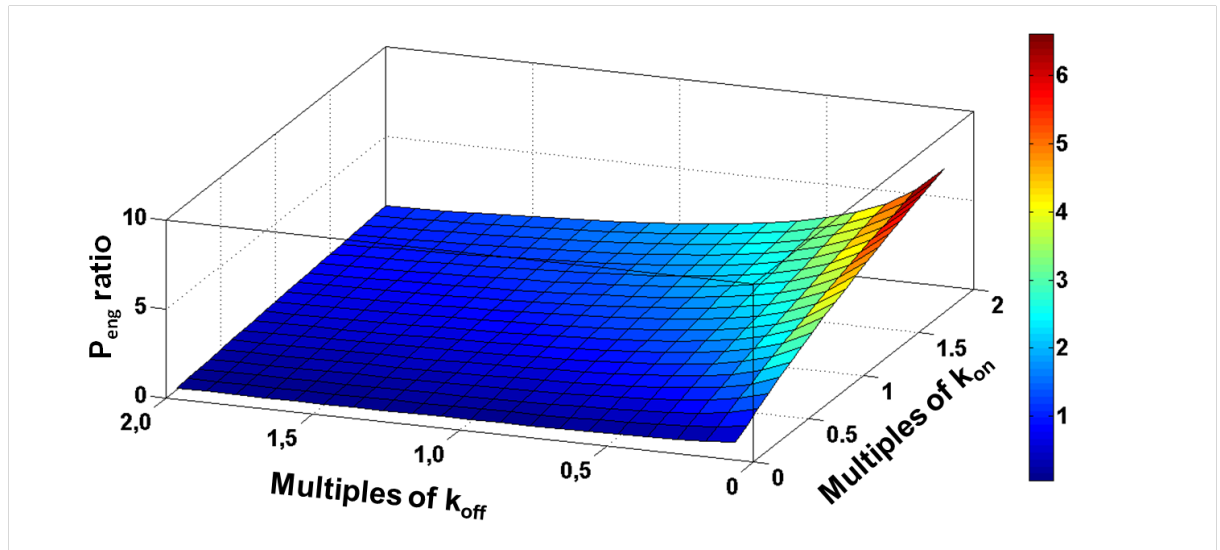

**Figure S6.**  $P_{eng}$  fold change as a function of varying  $k_{on}$  and  $k_{off}$  from one-tenth to two-fold of their original values (i.e.,  $k_{on}=0.0216 \text{ s}^{-1}$  and  $k_{off}=0.00159 \text{ s}^{-1}$ ).

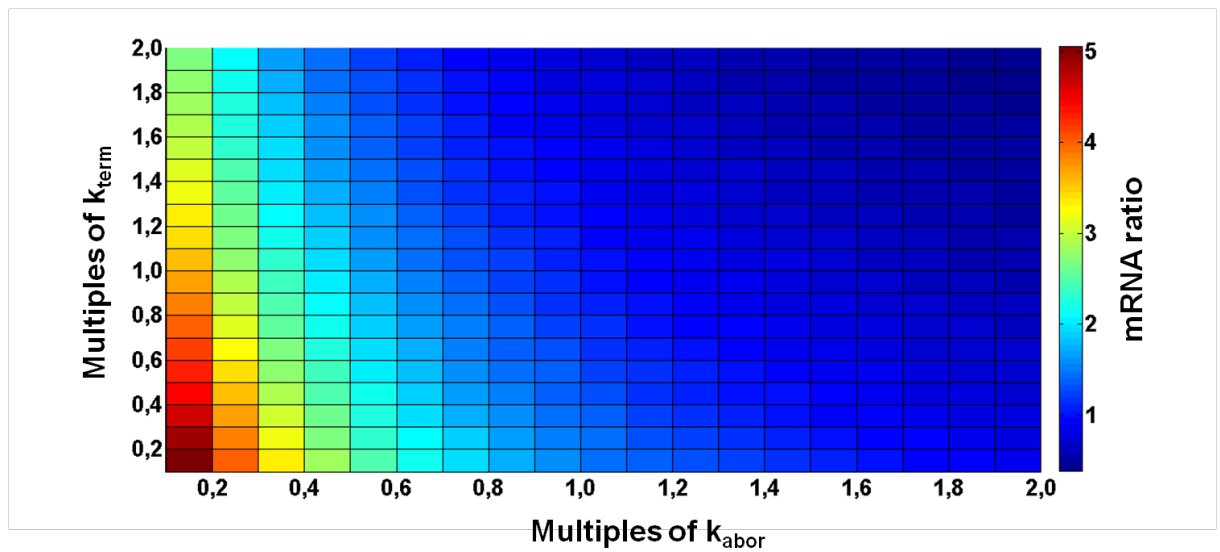

**Figure S7.** mRNA fold change as a function of varying  $k_{abor}$  and  $k_{term}$  from one-tenth to two-fold of their original values (i.e.,  $k_{abor}=0.0170 \text{ s}^{-1}$  and  $k_{term}=0.0016 \text{ s}^{-1}$ ).

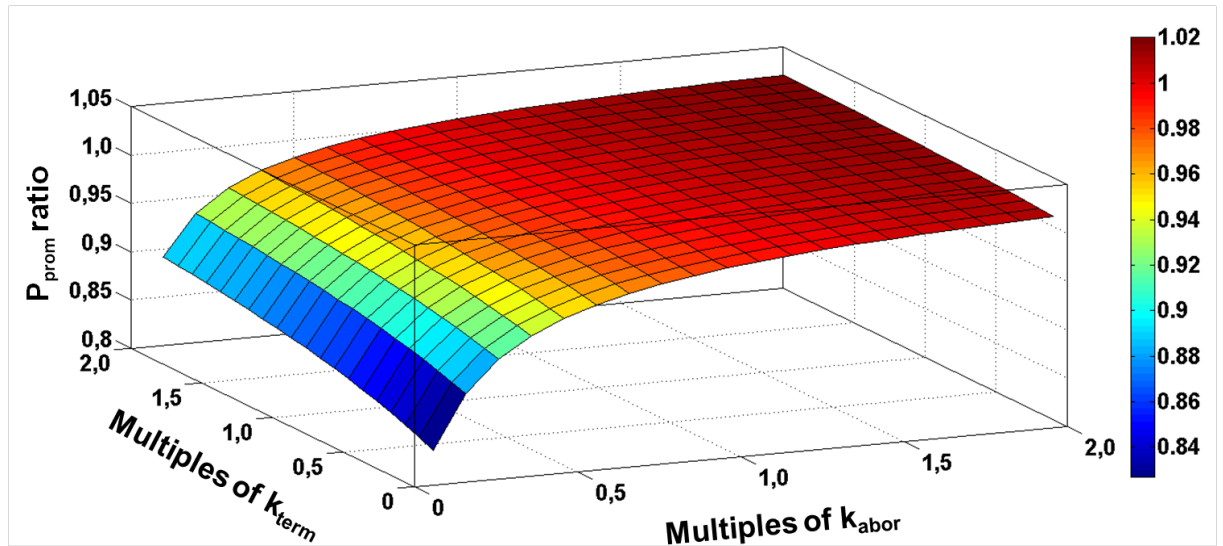

**Figure S8.**  $P_{\text{prom}}$  fold change as a function of varying  $k_{\text{abor}}$  and  $k_{\text{term}}$  from one-tenth to two-fold of their original values (i.e.,  $k_{\text{abor}}=0.0170 \text{ s}^{-1}$  and  $k_{\text{term}}=0.0016 \text{ s}^{-1}$ ).

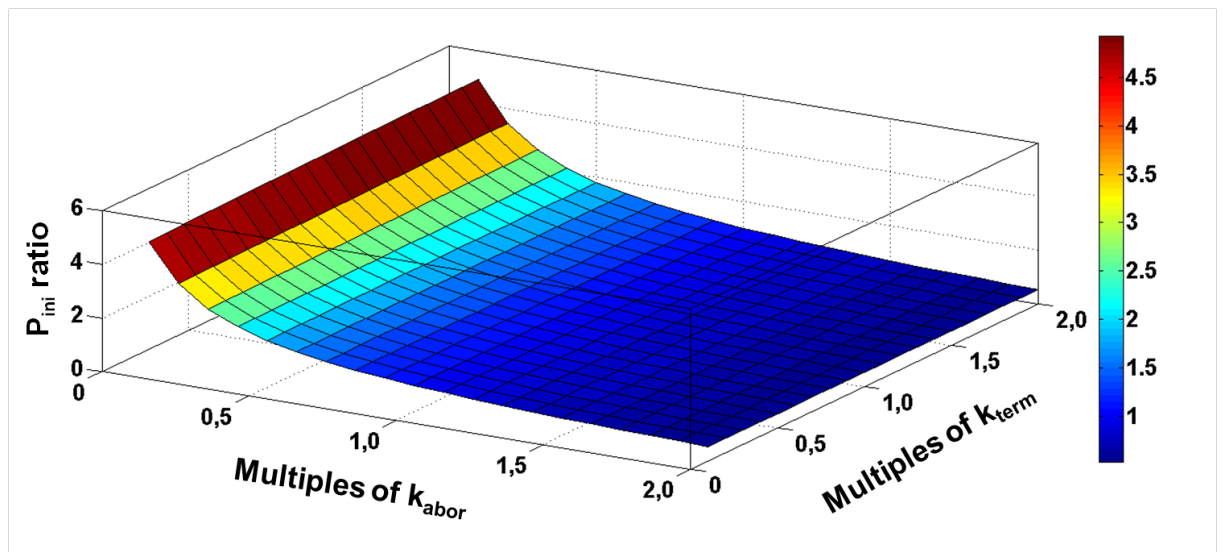

**Figure S9.**  $P_{\text{ini}}$  fold change as a function of varying  $k_{\text{abor}}$  and  $k_{\text{term}}$  from one-tenth to two-fold of their original values (i.e.,  $k_{\text{abor}}=0.0170 \text{ s}^{-1}$  and  $k_{\text{term}}=0.0016 \text{ s}^{-1}$ ).

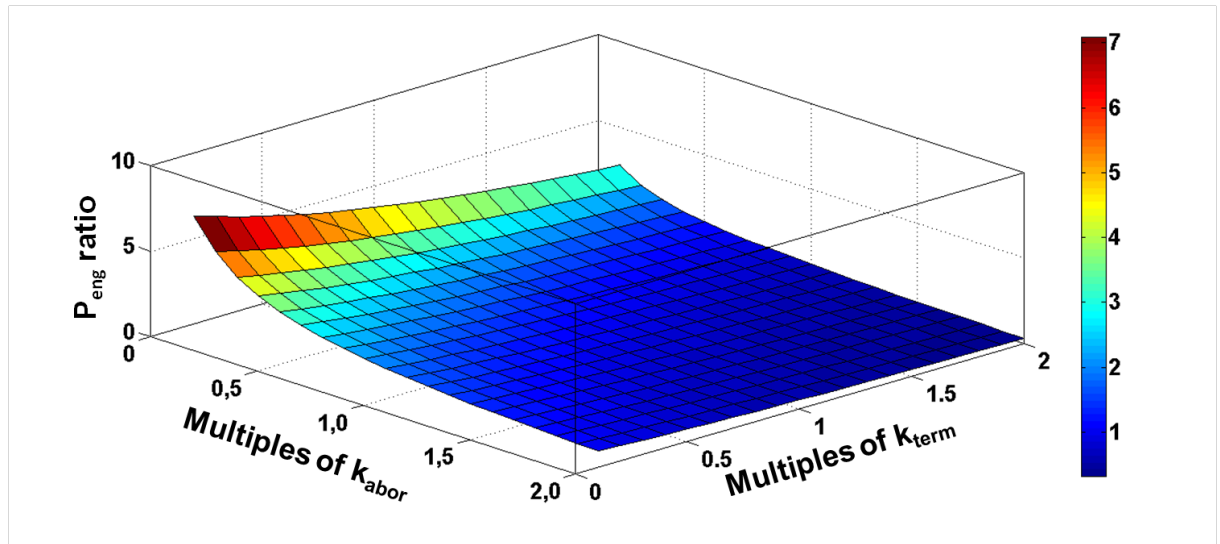

**Figure S10.**  $P_{eng}$  fold change as a function of varying  $k_{abor}$  and  $k_{term}$  from one-tenth to two-fold of their original values (i.e.,  $k_{abor}=0.0170 \text{ s}^{-1}$  and  $k_{term}=0.0016 \text{ s}^{-1}$ ).

## References

<sup>1</sup> Ferguson, Heather A., Jennifer F. Kugel, and James A. Goodrich. "Kinetic and mechanistic analysis of the RNA polymerase II transcription reaction at the human interleukin-2 promoter." *Journal of molecular biology* 314.5 (2001): 993-1006.

<sup>2</sup> Darzacq, Xavier, et al. "In vivo dynamics of RNA polymerase II transcription." *Nature structural & molecular biology* 14.9 (2007): 796-806.
